# Supplementary material for: Complete mitochondrial genome of the medicinal fungus Ophiocordyceps sinensis
Source: PubMed Central journal article supplement (PMC4570212; doi:10.1038/srep13892), 2015-09-15
Supplement: srep13892-s2.pdf [file srep13892-s2.pdf]

1 Complete mitochondrial genome of the medicinal fungus *Ophiocordyceps sinensis*

2

3 Yi Li<sup>1,2</sup>, Xiao-Di Hu<sup>1,3</sup>, Rui-Heng Yang<sup>1,3</sup>, Tom Hsiang<sup>4</sup>, Ke Wang<sup>1,3</sup> De-Quan Liang<sup>5</sup>,

4 Fan Liang<sup>5</sup>, De-Ming Cao<sup>5</sup>, Fan Zhou<sup>5</sup>, Ge Wen<sup>5</sup> & Yi-Jian Yao<sup>1</sup>

5

6 <sup>1</sup>State Key Laboratory of Mycology, Institute of Microbiology, Chinese Academy of

7 Sciences, Beijing 100101, China; <sup>2</sup>College of Plant Protection, Fujian Agriculture and

8 Forestry University, Fuzhou 350002, China; <sup>3</sup>University of Chinese Academy of

9 Sciences, Beijing 100049, China; <sup>4</sup>School of Environmental Sciences, University of

10 Guelph, Ontario, N1G 2W1, Canada; <sup>5</sup>Nextomics Biosciences Co., Ltd., Wuhan

11 430075, China.

12

13 Correspondence and requests for materials should be addressed to Y.-J.Y.

14 (yaoyj@im.ac.cn)

15

16

17

18

19

20

21

22

**Table S1. Primers used for verification.**

| <b>Primers</b> | <b>Sequences</b>                    | <b>Location</b> | <b>Length (bp)</b> | <b>Mismatches detected</b> |
|----------------|-------------------------------------|-----------------|--------------------|----------------------------|
| OSMT1F         | 5'-AACATATAGGTGTTACTAGACCAGC-3'     | 5070–5094       | 1465               | 0                          |
| OSMT1R         | 5'-CTCTGAAATACGATAGAGTTTCTTAAC-3'   | 6507–6534       |                    |                            |
| OSMT2F         | 5'-AAGTTAAGGGTGGAGATCCGTC-3'        | 22247–22268     | 1736               | 0                          |
| OSMT2R         | 5'-GCTTCAATATTTCACTCTACCAATTGAG-3'  | 23954–23981     |                    |                            |
| OSMT7F         | 5'-ATAGCTATGACTTTTAAGAGTTTCG-3'     | 139643–139666   | 1257               | 1 indel                    |
| OSMT7R         | 5'-TGTATGCCAGCTAATATCTTATCATCG-3'   | 140874–140900   |                    |                            |
| OSMT6F         | 5'-TATTAGCCCTATCGTAAAAGGTAAAAGC-3'  | 142509–142536   | 1849               | 0                          |
| OSMT6R         | 5'-TTGTACCGCGAGAGTGTGGTTAC-3'       | 144335–144357   |                    |                            |
| OSMT5F         | 5'-GGTACCATACTAGTACTAAATAACACTAG-3' | 144263–144291   | 1639               | 2 indels                   |
| OSMT5R         | 5'-ACCTGCTTTATCCCTTATGCGCTGTG-3'    | 145871–145901   |                    |                            |
| OSMT4F         | 5'-CGATATAAGAACAAGTGAATTACAAAGC-3'  | 149268–149250   | 1639               | 1 indel                    |
| OSMT4R         | 5'-GTGCTTCCATATGTGTATACATAG-3'      | 150883–150906   |                    |                            |
| OSMT3F         | 5'-GTAGGCTTATGAATAATTAATTCATCG-3'   | 154175–154201   | 1608               | 1 indel                    |
| OSMT3R         | 5'-TAAGCTGTAGCTAGGTTACTCAAAGC-3'    | 155757–155782   |                    |                            |
| Total          |                                     |                 | 11193              | 5                          |

**Table S2. Annotated conserved protein-coding and rRNA genes in the mt genome of *Ophiocordyceps sinensis* .**

| Gene         | Start  | End    | Strand | Length (bp) | Introns |          |           | Exon length (bp) | Coding sequence density |
|--------------|--------|--------|--------|-------------|---------|----------|-----------|------------------|-------------------------|
|              |        |        |        |             | group I | group II | uncertain |                  |                         |
| <i>rnl</i>   | 1      | 19704  | +      | 19704       | 6       | 2        | 1         | 3629             | 18.42%                  |
| <i>rps3</i>  | 14837  | 16418  | +      | 1582        |         |          |           | 1582             | 100.00%                 |
| <i>nad2</i>  | 29905  | 36732  | +      | 6828        | 2       | 1        |           | 1731             | 25.35%                  |
| <i>nad3</i>  | 36733  | 37146  | +      | 414         |         |          |           | 414              | 100.00%                 |
| <i>atp9</i>  | 37382  | 38676  | +      | 1295        | 1       |          |           | 225              | 17.37%                  |
| <i>cox2</i>  | 38810  | 50132  | +      | 11323       | 5       |          |           | 705              | 6.23%                   |
| <i>nad4L</i> | 50367  | 52143  | +      | 1777        | 1       |          |           | 270              | 15.19%                  |
| <i>nad5</i>  | 52143  | 62698  | +      | 10556       | 5       |          |           | 1957             | 18.54%                  |
| <i>cob</i>   | 64355  | 79753  | +      | 15399       | 5       | 1        |           | 1161             | 7.54%                   |
| <i>cox1</i>  | 80393  | 111166 | +      | 30774       | 12      | 1        |           | 1581             | 5.14%                   |
| <i>nad1</i>  | 111930 | 123377 | +      | 11448       | 3       |          |           | 1164             | 10.17%                  |
| <i>nad4</i>  | 123878 | 125209 | +      | 1332        |         |          |           | 1332             | 100.00%                 |
| <i>atp8</i>  | 127206 | 127352 | +      | 147         |         |          |           | 147              | 100.00%                 |
| <i>atp6</i>  | 127438 | 133685 | +      | 6248        | 2       |          | 1         | 777              | 12.44%                  |
| <i>rns</i>   | 135851 | 139570 | +      | 3720        |         | 1        |           | 1694             | 45.54%                  |
| <i>cox3</i>  | 142695 | 146413 | +      | 3719        | 2       |          |           | 810              | 21.78%                  |
| <i>nad6</i>  | 148250 | 149694 | +      | 1445        |         |          | 1         | 668              | 46.23%                  |
| Total        |        |        |        |             | 44      | 6        | 2         |                  |                         |

**Table S3. Transfer RNA genes in the mt genome of *Ophiocordyceps sinensis* .**

| <b>tRNA</b> | <b>Codon usage</b> | <b>Start</b> | <b>End</b> | <b>Length (bp)</b> | <b>Strand</b> |
|-------------|--------------------|--------------|------------|--------------------|---------------|
| tRNA-Ala    | GCA                | 25665        | 25737      | 73                 | +             |
| tRNA-Arg    | CGU                | 50208        | 50280      | 73                 | +             |
|             | AGA                | 111311       | 111383     | 73                 | +             |
| tRNA-Asn    | AAC                | 142566       | 142639     | 74                 | +             |
| tRNA-Asp    | GAC                | 139705       | 139777     | 73                 | +             |
| tRNA-Cys    | UGC                | 79904        | 79975      | 72                 | +             |
| tRNA-Gln    | CAA                | 28237        | 28310      | 74                 | +             |
| tRNA-Glu    | GAA                | 20009        | 20081      | 73                 | +             |
| tRNA-Gly    | GGA                | 26398        | 26468      | 71                 | +             |
|             | GGA                | 148100       | 148170     | 71                 | +             |
| tRNA-His    | CAC                | 28500        | 28574      | 75                 | +             |
| tRNA-Ile    | AUA                | 146749       | 146820     | 72                 | +             |
|             | AUC                | 151682       | 151753     | 72                 | +             |
| tRNA-Leu    | UUA                | 20231        | 20313      | 83                 | +             |
|             | CUA                | 27781        | 27864      | 84                 | +             |
| tRNA-Lys    | AAA                | 24181        | 24253      | 73                 | +             |
|             | AUG                | 20085        | 20155      | 71                 | +             |
| tRNA-Met    | AUG                | 20158        | 20230      | 73                 | +             |
|             | AUG                | 29556        | 29626      | 71                 | +             |
| tRNA-Phe    | UUC                | 23944        | 24016      | 73                 | +             |
| tRNA-Pro    | CCA                | 157361       | 157433     | 73                 | +             |
| tRNA-Ser    | AGC                | 140645       | 140726     | 82                 | +             |
|             | UCA                | 155644       | 155729     | 86                 | +             |
| tRNA-Thr    | ACA                | 19707        | 19778      | 72                 | +             |
| tRNA-Trp    | UGA                | 155837       | 155908     | 72                 | +             |
| tRNA-Tyr    | UAC                | 139599       | 139682     | 84                 | +             |
| tRNA-Val    | GUA                | 150983       | 151055     | 73                 | +             |
| Total       |                    |              |            | 2016               |               |

**Table S4. Lengths and types of all the introns in the mt genome of *Ophiocordyceps sinensis* .**

| Gene         | Intron 1 | Intron 2       | Intron 3       | Intron 4 | Intron 5 | Intron 6 | Intron 7 | Intron 8 | Intron 9 | Intron 10 | Intron 11 | Intron 12 | Intron 13      | Total length (bp) | Average length (bp) |
|--------------|----------|----------------|----------------|----------|----------|----------|----------|----------|----------|-----------|-----------|-----------|----------------|-------------------|---------------------|
| <i>cox1</i>  | 2535/IB  | 1504/IB        | <u>2843/IB</u> | 3267/IB  | 1165/IB  | 2242/ID  | 1054/IB  | 1124/IB  | 1663/IB  | 1262/IB   | 2478/II   | 6435/IB   | <u>1616/IB</u> | 29188             | 2245                |
| <i>rnl</i>   | 2938/II  | <u>1439/IA</u> | <u>1243/IA</u> | 1358/IC2 | 522      | 1343/IC2 | 2091/II  | 3869/IA  | 1272/IA  |           |           |           |                | 16075             | 1786                |
| <i>cob</i>   | 2525/II  | 2588/IB        | 3228/IC2       | 1726/IB  | 2039/IA  | 2132/IA  |          |          |          |           |           |           |                | 14238             | 2373                |
| <i>cox2</i>  | 1412/IC2 | 1527/IC2       | 2504/IC2       | 3232/IC2 | 1943/IC1 |          |          |          |          |           |           |           |                | 10618             | 2124                |
| <i>nad5</i>  | 1958/ID  | 2968/ID        | 1181/ID        | 1108/IB  | 1384/IC2 |          |          |          |          |           |           |           |                | 8599              | 1720                |
| <i>nad1</i>  | 5139/IB  | <u>3634/IA</u> | 1511/IB        |          |          |          |          |          |          |           |           |           |                | 10284             | 3248                |
| <i>nad2</i>  | 1396/IC2 | 2338/II        | 1363/IC2       |          |          |          |          |          |          |           |           |           |                | 5097              | 1699                |
| <i>atp6</i>  | 1533/IB  | 3855/IC2       | 83             |          |          |          |          |          |          |           |           |           |                | 5471              | 1824                |
| <i>cox3</i>  | 1411/IB  | 1498/IC2       |                |          |          |          |          |          |          |           |           |           |                | 2909              | 1455                |
| <i>rns</i>   | 2026/II  |                |                |          |          |          |          |          |          |           |           |           |                | 2026              | 2026                |
| <i>nad4L</i> | 1507/IC1 |                |                |          |          |          |          |          |          |           |           |           |                | 1507              | 1507                |
| <i>nad6</i>  | 777      |                |                |          |          |          |          |          |          |           |           |           |                | 777               | 777                 |
| <i>atp9</i>  | 1070/IA  |                |                |          |          |          |          |          |          |           |           |           |                | 1070              | 1070                |
| Total        |          |                |                |          |          |          |          |          |          |           |           |           |                | 107859            | 2004                |

Underlined, derived group I introns.

**Table S5. Non-conserved open reading frames (ncORFs) in the mt genome of *Ophiocordyceps sinensis* .**

| ncORFs  | Reading frame | Start | End   | Length | Location          | Annotation                                               | E-value     | Accession      |
|---------|---------------|-------|-------|--------|-------------------|----------------------------------------------------------|-------------|----------------|
| ncORF1  | 1             | 2338  | 2895  | 558    | rnl-i1/II         | reverse transcriptases (RTs) with group II intron origin | 2.46E-25    | cd01651        |
| ncORF2  | -3            | 2412  | 2717  | 306    | rnl-i1/II         | reverse transcriptases (RTs) with group II intron origin | 1.24E-20    | cd01651        |
| ncORF3  | 1             | 4408  | 4764  | 357    | rnl-i2/I          | GIY-YIG endonuclease                                     | 1.62E-23    | cd10445        |
| ncORF4  | -2            | 4795  | 5142  | 348    | rnl-i2/I          | GIY-YIG endonuclease                                     | 0.00003     | YP_009072317.1 |
| ncORF5  | 1             | 6878  | 7180  | 303    | rnl-i4/I          | hypothetical protein                                     |             |                |
| ncORF6  | 1             | 9515  | 9829  | 315    | rnl-i6/I          | LAGLIDADG endonuclease                                   | 5.95E-15    | pfam00961      |
| ncORF7  | 1             | 9866  | 10432 | 567    | rnl-i6/I          | LAGLIDADG endonuclease                                   | 6.06E-10    | pfam00961      |
| ncORF8  | 3             | 12322 | 12714 | 393    | rnl-i7/I          | LAGLIDADG endonuclease                                   | 1.15E-08    | pfam00961      |
| ncORF9  | 1             | 18287 | 18880 | 594    | rnl-i9/I          | LAGLIDADG endonuclease                                   | 6.73E-18    | pfam03161      |
| ncORF10 | -2            | 30812 | 31123 | 312    | nad2-i1/I         | LAGLIDADG endonuclease                                   | 0.00816     | pfam00961      |
| ncORF11 | 1             | 32528 | 32842 | 315    | nad2-i2/II        | reverse transcriptases (RTs) with group II intron origin | 1.95E-20    | cd01651        |
| ncORF12 | 1             | 32897 | 33277 | 381    | nad2-i2/II        | reverse transcriptases (RTs) with group II intron origin | 6.34E-16    | cd01651        |
| ncORF13 | 1             | 33590 | 34108 | 519    | nad2-i2/II        | reverse transcriptases (RTs) with group II intron origin | 6.86E-11    | pfam01348      |
| ncORF14 | 2             | 35112 | 35567 | 456    | nad2-i3/I         | LAGLIDADG endonuclease                                   | 6.84E-18    | pfam00961      |
| ncORF15 | 1             | 39014 | 39361 | 348    | cox2-i1/I         | LAGLIDADG endonuclease                                   | 4E-20       | YP_008757687.1 |
| ncORF16 | 2             | 40833 | 41345 | 513    | cox2-i2/I         | LAGLIDADG endonuclease                                   | 3.8E-18     | pfam00961      |
| ncORF17 | 3             | 42886 | 43212 | 327    | cox2-i3/I         | LAGLIDADG endonuclease                                   | 1.61E-11    | pfam00961      |
| ncORF18 | 1             | 43550 | 44257 | 708    | cox2-i4/I         | GIY-YIG endonuclease                                     | 2.17E-19    | cd10445        |
| ncORF19 | 2             | 45423 | 45854 | 432    | cox2-i5/I         | GIY-YIG endonuclease                                     | 0.000000007 | CDL73257.1     |
| ncORF20 | 2             | 48993 | 49724 | 732    | cox2-i6/I         | GIY-YIG endonuclease                                     | 2E-144      | AGN49031.1     |
| ncORF21 | 2             | 51267 | 51701 | 435    | nad4L-i/I         | LAGLIDADG endonuclease                                   | 2.83E-14    | pfam00961      |
| ncORF22 | 2             | 52710 | 53060 | 351    | nad5-i1/I         | LAGLIDADG endonuclease                                   | 1.75E-08    | pfam00961      |
| ncORF23 | 2             | 53214 | 53534 | 321    | nad5-i1/I         | LAGLIDADG endonuclease                                   | 1E-39       | YP_009072396.1 |
| ncORF24 | 1             | 58367 | 58708 | 342    | nad5-i3/I         | hypothetical protein                                     |             |                |
| ncORF25 | 1             | 61445 | 61840 | 396    | nad5-i5/I         | LAGLIDADG endonuclease                                   | 1.53E-13    | pfam00961      |
| ncORF26 | 3             | 62818 | 63321 | 504    | intergenic region | fibronectin-attachment protein                           | 0.0000055   | pfam07174      |
| ncORF27 | -3            | 63328 | 63744 | 417    | intergenic region | SDA1 protein                                             | 0.000557    | pfam05285      |
| ncORF28 | 3             | 64903 | 65238 | 336    | cob-i1/II         | Reverse transcriptases                                   | 3E-14       | YP_008964951.1 |
| ncORF29 | 3             | 65566 | 66399 | 834    | cob-i1/II         | Reverse transcriptases (RTs) with group II intron origin | 4.75E-23    | cd01651        |
| ncORF30 | -1            | 65769 | 66209 | 441    | cob-i1/II         | Reverse transcriptases (RTs) with group II intron origin | 1.01E-13    | cd01651        |
| ncORF31 | -1            | 67371 | 67682 | 312    | cob-i2/I          | LAGLIDADG endonuclease                                   | 0.000362    | pfam00961      |
| ncORF32 | 2             | 70827 | 71978 | 1152   | cob-i3/I          | hypothetical protein                                     |             |                |
| ncORF33 | 3             | 73993 | 74835 | 843    | cob-i4/I          | LAGLIDADG endonuclease                                   | 0.00087     | pfam00961      |
| ncORF34 | 3             | 75022 | 75477 | 456    | cob-i5/I          | reverse gyrase                                           | 0.00322     | PRK14701       |
| ncORF35 | 1             | 75764 | 76369 | 606    | cob-i6/I          | LAGLIDADG endonuclease                                   | 9.38E-29    | pfam03161      |

|         |    |        |        |     |                   |                                                          |             |                |
|---------|----|--------|--------|-----|-------------------|----------------------------------------------------------|-------------|----------------|
| ncORF36 | 1  | 82148  | 82651  | 504 | cox1-i1/I         | GIY-YIG endonuclease                                     | 0.0000032   | cd10445        |
| ncORF37 | -3 | 88090  | 88458  | 369 | cox1-i4/I         | LAGLIDADG endonuclease                                   | 0.000000564 | pfam00961      |
| ncORF38 | 1  | 88187  | 89179  | 993 | cox1-i4/I         | LAGLIDADG endonuclease                                   | 3.56E-15    | pfam00961      |
| ncORF39 | 2  | 100143 | 100511 | 369 | cox1-i10/II       | hypothetical protein                                     |             |                |
| ncORF40 | 1  | 101168 | 101686 | 519 | cox1-i10/II       | Reverse transcriptases (RTs) with group II intron origin | 1.35E-09    | cd01651        |
| ncORF41 | 3  | 101965 | 102486 | 522 | cox1-i10/II       | Reverse transcriptases (RTs) with group II intron origin | 0.000794    | pfam01348      |
| ncORF42 | 3  | 104119 | 104706 | 588 | cox1-i11/I        | LAGLIDADG endonuclease                                   | 5.83E-12    | pfam00961      |
| ncORF43 | 2  | 105141 | 105554 | 414 | cox1-i11/I        | hypothetical protein                                     |             |                |
| ncORF44 | 2  | 105693 | 106247 | 555 | cox1-i11/I        | LAGLIDADG endonuclease                                   | 1E-56       | CDL73453.1     |
| ncORF45 | 3  | 106360 | 106671 | 312 | cox1-i11/I        | hypothetical protein                                     |             |                |
| ncORF46 | 1  | 115202 | 115651 | 450 | nad1-i1/I         | GIY-YIG endonuclease                                     | 2E-29       | YP_007507077.1 |
| ncORF47 | 3  | 122482 | 122880 | 399 | nad1-i3/I         | GIY-YIG endonuclease                                     | 1.37E-10    | cd00283        |
| ncORF48 | 3  | 125650 | 126075 | 426 | intergenic region | hypothetical protein                                     |             |                |
| ncORF49 | 2  | 130923 | 131291 | 369 | atp6-i2/I         | GIY-YIG endonuclease                                     | 2.48E-11    | cd00283        |
| ncORF50 | 3  | 131599 | 131940 | 342 | atp6-i2/I         | GIY-YIG endonuclease                                     | 2E-28       | YP_001427393.1 |
| ncORF51 | 2  | 132342 | 133292 | 951 | atp6-i2/I         | GIY-YIG endonuclease                                     | 6.39E-10    | cd10445        |
| ncORF52 | 1  | 133703 | 134245 | 543 | intergenic region | hypothetical protein                                     |             |                |
| ncORF53 | 1  | 134279 | 134821 | 543 | intergenic region | hypothetical protein                                     |             |                |
| ncORF54 | 1  | 141638 | 142102 | 465 | intergenic region | hypothetical protein                                     |             |                |
| ncORF55 | 3  | 144532 | 144867 | 336 | cox3-i2/I         | LAGLIDADG endonuclease                                   | 5E-25       | YP_001249345.1 |
| ncORF56 | -3 | 153193 | 153591 | 399 | intergenic region | DNA-dependent RNA polymerase                             | 1.03E-11    | COG5108        |
| ncORF57 | -3 | 153682 | 154128 | 447 | intergenic region | T3/T7-like RNA polymerase                                | 1.18E-12    | PHA00452       |
| ncORF58 | -3 | 154501 | 155490 | 990 | intergenic region | hypothetical protein                                     |             |                |

28335

---

**Table S6. Transcription analyses of conserved protein-coding genes and ncORFs.**

| <b>Gene</b>   | <b>Exon length</b> | <b>Mapped reads</b> | <b>RPKM</b> | <b>ncORFs</b> | <b>Length</b> | <b>Mapped reads</b> | <b>RPKM</b> |
|---------------|--------------------|---------------------|-------------|---------------|---------------|---------------------|-------------|
| <i>atp6</i>   | 777                | 126                 | 3.630905634 | ncORF1        | 558           | 85782               | 3455.421157 |
| <i>atp8</i>   | 147                | 5                   | 0.764524996 | ncORF2        | 306           | 1                   | 0.073454362 |
| <i>atp9</i>   | 225                | 252                 | 25.17427906 | ncORF3        | 357           | 128                 | 8.058992897 |
| <i>cob</i>    | 1161               | 1076                | 17.16486127 | ncORF4        | 348           | 328                 | 21.18525126 |
| <i>cox1</i>   | 1581               | 6888                | 51.76255976 | ncORF5        | 303           | 557                 | 41.31916972 |
| <i>cox2</i>   | 705                | 361                 | 11.86287952 | ncORF6        | 315           | 55                  | 3.924561645 |
| <i>cox3</i>   | 812                | 757                 | 20.95457562 | ncORF7        | 567           | 234                 | 9.276236616 |
| <i>nad1</i>   | 1164               | 586                 | 11.31575811 | ncORF8        | 393           | 4202                | 240.3269734 |
| <i>nad2</i>   | 1731               | 159                 | 2.064614989 | ncORF9        | 594           | 1322                | 50.02464664 |
| <i>nad3</i>   | 414                | 435                 | 23.61717433 | ncORF10       | 312           | 207                 | 14.91264814 |
| <i>nad4</i>   | 1332               | 179                 | 3.020562495 | ncORF11       | 315           | 37                  | 2.640159652 |
| <i>nad4L</i>  | 270                | 110                 | 9.157310505 | ncORF12       | 381           | 117                 | 6.902396537 |
| <i>nad5</i>   | 1957               | 699                 | 8.028332845 | ncORF13       | 519           | 117                 | 5.067077226 |
| <i>nad6</i>   | 668                | 163                 | 5.484665696 | ncORF14       | 456           | 5                   | 0.246458716 |
| <i>rnl</i>    | 3629               | 75209               | 465.8240055 | ncORF15       | 348           | 150                 | 9.688377102 |
| <i>rns</i>    | 1696               | 74467               | 986.9088185 | ncORF16       | 513           | 129                 | 5.652119881 |
| <i>rps3</i>   | 1582               | 3127                | 44.42837425 | ncORF17       | 327           | 7                   | 0.481159768 |
| tRNA-Ala(TGC) | 73                 | 6                   | 1.847427524 | ncORF18       | 708           | 143                 | 4.539853089 |
| tRNA-Arg(TCT) | 73                 | 2                   | 0.615809175 | ncORF19       | 432           | 124                 | 6.451741492 |
| tRNA-Asp(GTC) | 73                 | 9                   | 2.771141286 | ncORF20       | 732           | 46                  | 1.412491263 |
| tRNA-Gln(TTG) | 74                 | 3                   | 0.911231144 | ncORF21       | 435           | 117                 | 6.045547312 |
| tRNA-Glu(TTC) | 73                 | 18                  | 5.542282572 | ncORF22       | 351           | 45                  | 2.881671138 |
| tRNA-Gly(TCC) | 71                 | 10                  | 3.16577956  | ncORF23       | 321           | 189                 | 13.23414203 |
| tRNA-His(GTG) | 75                 | 64                  | 19.18040309 | ncORF24       | 342           | 252                 | 16.5620257  |
| tRNA-Ile(GAT) | 72                 | 7                   | 2.18526728  | ncORF25       | 396           | 465                 | 26.39348792 |
| tRNA-Ile(TAT) | 72                 | 56                  | 17.48213824 | ncORF26       | 504           | 4435                | 197.7889875 |
| tRNA-Leu(TAA) | 83                 | 8                   | 2.166461193 | ncORF27       | 417           | 11455               | 617.4446871 |



|               |    |        |             |         |      |      |             |
|---------------|----|--------|-------------|---------|------|------|-------------|
| tRNA-Leu(TAG) | 84 | 18     | 4.816507473 | ncORF28 | 336  | 2182 | 145.9669348 |
| tRNA-Lys(TTT) | 73 | 27     | 8.313423858 | ncORF29 | 834  | 1877 | 50.58680391 |
| tRNA-Met(CAT) | 71 | 10     | 3.16577956  | ncORF30 | 441  | 0    | 0           |
| tRNA-Phe(GAA) | 73 | 15     | 4.61856881  | ncORF31 | 312  | 10   | 0.720417784 |
| tRNA-Pro(TGG) | 73 | 15     | 4.61856881  | ncORF32 | 1152 | 1221 | 23.82331561 |
| tRNA-Ser(GCT) | 82 | 3      | 0.822330544 | ncORF33 | 843  | 8    | 0.213305195 |
| tRNA-Ser(TGA) | 86 | 6      | 1.568165224 | ncORF34 | 456  | 1    | 0.049291743 |
| tRNA-Thr(TGT) | 72 | 21     | 6.555801839 | ncORF35 | 606  | 24   | 0.890179599 |
| tRNA-Trp(TCA) | 72 | 2      | 0.62436208  | ncORF36 | 504  | 285  | 12.71022806 |
| tRNA-Tyr(GTA) | 84 | 8      | 2.140669988 | ncORF37 | 369  | 84   | 5.116723386 |
| tRNA-Val(TAC) | 73 | 2      | 0.615809175 | ncORF38 | 993  | 133  | 3.010519273 |
|               |    | 164909 |             | ncORF39 | 369  | 1563 | 95.20760301 |
|               |    |        |             | ncORF40 | 519  | 4402 | 190.6433671 |
|               |    |        |             | ncORF41 | 522  | 896  | 38.58127059 |
|               |    |        |             | ncORF42 | 588  | 52   | 1.987764989 |
|               |    |        |             | ncORF43 | 414  | 370  | 20.08817127 |
|               |    |        |             | ncORF44 | 555  | 68   | 2.753943012 |
|               |    |        |             | ncORF45 | 312  | 322  | 23.19745266 |
|               |    |        |             | ncORF46 | 450  | 78   | 3.896019379 |
|               |    |        |             | ncORF47 | 399  | 2819 | 158.8039131 |
|               |    |        |             | ncORF48 | 426  | 574  | 30.28595779 |
|               |    |        |             | ncORF49 | 369  | 238  | 14.49738293 |
|               |    |        |             | ncORF50 | 342  | 1768 | 116.1970692 |
|               |    |        |             | ncORF51 | 951  | 890  | 21.03529026 |
|               |    |        |             | ncORF52 | 543  | 102  | 4.222205446 |
|               |    |        |             | ncORF53 | 543  | 6136 | 253.9946335 |
|               |    |        |             | ncORF54 | 465  | 61   | 2.948600274 |
|               |    |        |             | ncORF55 | 336  | 150  | 10.03439057 |
|               |    |        |             | ncORF56 | 399  | 1    | 0.056333421 |

|         |     |        |             |
|---------|-----|--------|-------------|
| ncORF57 | 447 | 2      | 0.100568389 |
| ncORF58 | 990 | 102    | 2.315815715 |
|         |     | 137068 |             |

---
